# Supplementary material for: Hungry for charge – how a beryllium scorpionate complex “eats” a weakly coordinating anion
Source: publisher site journal article supplement (doi:10.1515/znb-2020-0034), 2020-04-09

# Supporting Information

**Dominik Naglav-Hansen, Kevin Dzialkowski, Briac Tobey, Christoph Wölper, Georg Jansen and Stephan Schulz\***

**Hungry for charge – how a beryllium scorpionate complex “eats” a weakly coordinating anion**

DOI: 10.1515/znb-2020-0034. Received February 14, 2020; accepted March 12, 2020

**\*Corresponding author: Prof. Dr. Stephan Schulz**, Faculty of Chemistry and Center for NanoIntegration (Cenide), University of Duisburg-Essen, Universitätsstraße 7, S07S03C30, D-45141 Essen, Germany; FAX +49-201-18-33830; e-mail: [stephan.schulz@uni-due.de](mailto:stephan.schulz@uni-due.de). [https://www.uni-due.de/ak\\_schulz/index\\_en.php](https://www.uni-due.de/ak_schulz/index_en.php). ORCID: 0000-0003-2896-4488

**Dominik Naglav-Hansen:** Institute of Inorganic Chemistry, University of Tübingen, Auf der Morgenstelle 18, D- 72076 Tübingen, Germany.

**Kevin Dzialkowski, Briac Tobey, Christoph Wölper, Georg Jansen:** Faculty of Chemistry and Center for NanoIntegration (Cenide), University of Duisburg-Essen, Universitätsstraße 7, S07S03C30, D-45141 Essen, Germany.

## Content

**Fig. S1:**  $^1\text{H}$  NMR in  $\text{C}_6\text{D}_6$  of [1]

**Fig. S2:**  $^9\text{Be}$  NMR in toluene- $d_8$  [1]

**Fig. S3:**  $^{13}\text{C}$  NMR in  $\text{C}_6\text{D}_6$  [1]

## Single-crystal X-ray analyses

**Table S1:** Single crystal structure data

**Fig. S4:** Molecular structure of  $\text{Cp}^*\text{Be}^+$  from the DFT calculations (B3LYP/TZVPP, see main text).

**Fig. S5:** Molecular structure of  $\text{Cp}^*\text{BeOR}^{\text{F}}$  from the DFT calculations (B3LYP/TZVPP, see main text).

**Fig. S6:** Molecular structure of  $\text{Cp}^*\text{BeFAl}(\text{OR}^{\text{F}})_3$  from the DFT calculations (B3LYP/TZVPP, see main text).

**Fig. S7:** Molecular structure of  $\text{TpBe}^+$  from the DFT calculations (B3LYP/TZVPP, see main text).

**Fig. S8:** Molecular structure of  $\text{TpBeOR}^{\text{F}}$  from the DFT calculations (B3LYP/TZVPP, see main text).

**Fig. S9:** Molecular structure of  $\text{TpBeFAl}(\text{OR}^{\text{F}})_3$  from the DFT calculations (B3LYP/TZVPP, see main text).

**Fig. S10:** LOL plot of  $\text{Cp}^*\text{Be}^+$  in the C-C-Be plane

**Fig. S11:** LOL plot of  $\text{Cp}^*\text{BeOR}^{\text{F}}$  in the C-Be-O plane

**Fig. S12:** LOL plot of  $\text{Cp}^*\text{BeFAl}(\text{OR}^{\text{F}})_3$  in the C-Be-F plane

**Fig. S13:** LOL plot of  $\text{TpBe}^+$  in the Be-N-B plane

**Fig. S14:** LOL plot of  $\text{TpBeOR}^{\text{F}}$  in the N-Be-O plane

**Fig. S15:** LOL plot of  $\text{TpBeFAl}(\text{OR}^{\text{F}})_3$  in the N-Be-F plane

**S1:  $^1\text{H}$  NMR: 1 in  $\text{C}_6\text{D}_6$**

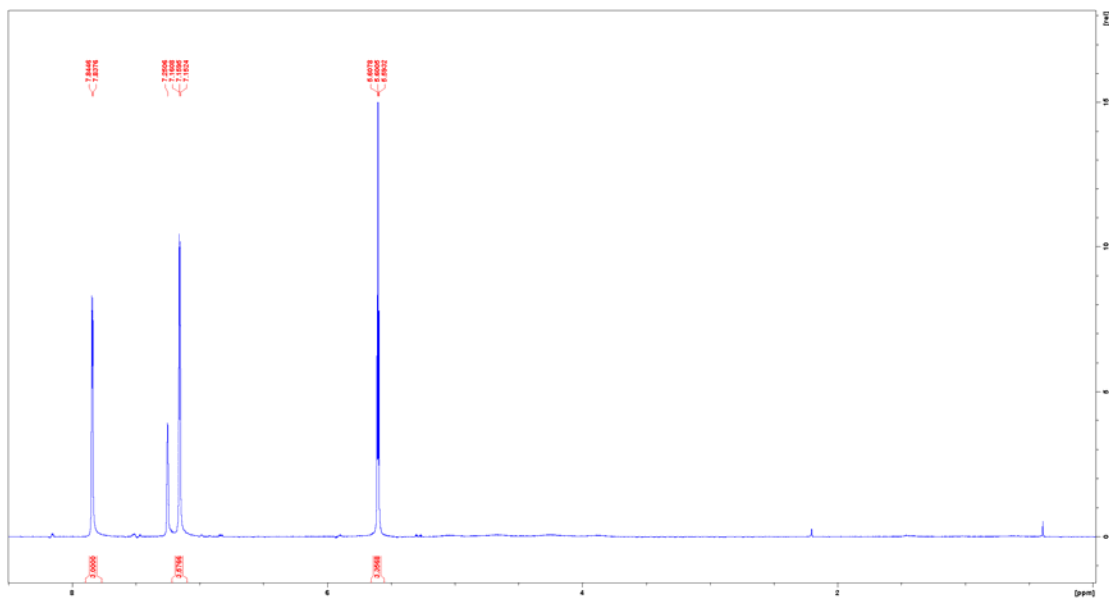

**S2:  $^9\text{Be}$  NMR: 1 in  $\text{C}_7\text{D}_8$**

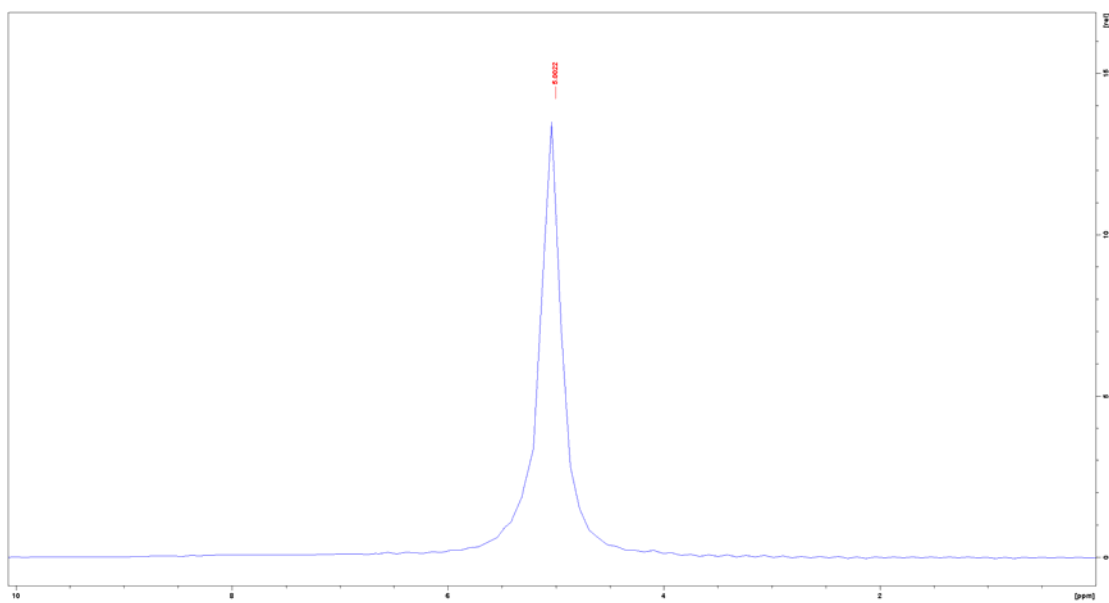

S3:  $^{13}\text{C}$  NMR: 1 in  $\text{C}_6\text{D}_6$

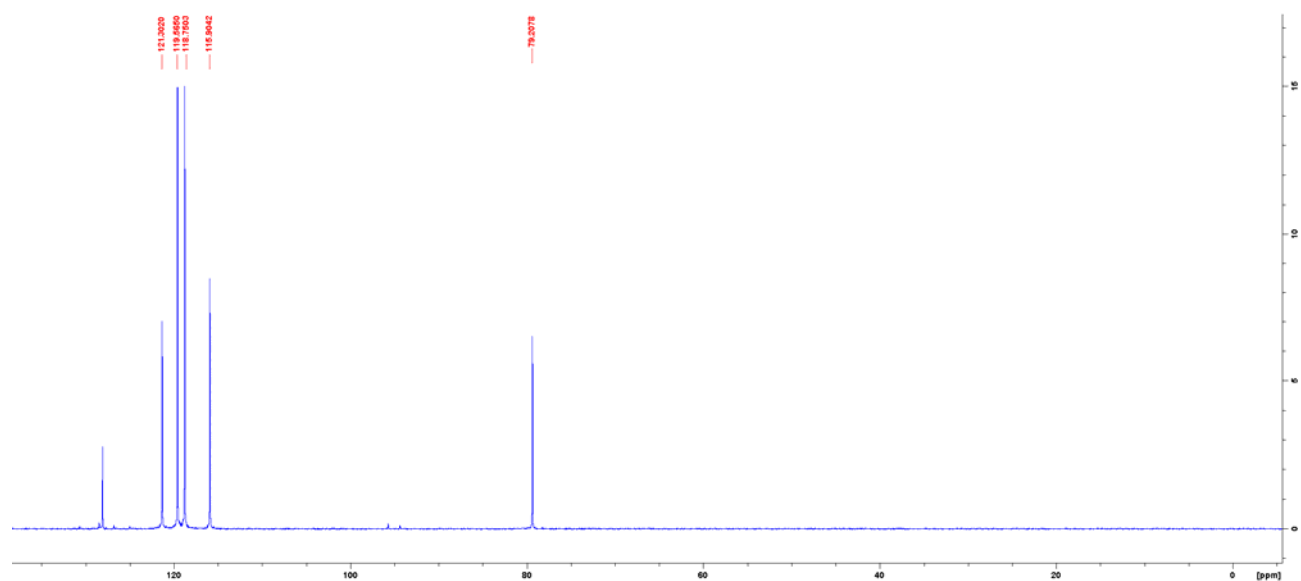

## Single-crystal X-ray analyses

**Table S1:** Single crystal structure data

| Identification code                               | dnp_130m                                                                        |
|---------------------------------------------------|---------------------------------------------------------------------------------|
| Empirical formula                                 | C <sub>13</sub> H <sub>10</sub> BB <sub>2</sub> F <sub>9</sub> N <sub>6</sub> O |
| Formula weight                                    | 457.09                                                                          |
| Density (calculated)                              | 1.658 g·cm <sup>-3</sup>                                                        |
| <i>F</i> (000)                                    | 912                                                                             |
| Temperature                                       | 100(2) K                                                                        |
| Crystal size                                      | 0.267 × 0.168 × 0.157 mm                                                        |
| Crystal colour                                    | colorless                                                                       |
| Crystal description                               | block                                                                           |
| Wavelength                                        | 0.71073 Å                                                                       |
| Crystal system                                    | monoclinic                                                                      |
| Space group                                       | <i>P</i> 2 <sub>1</sub> / <i>n</i>                                              |
| Unit cell dimensions                              |                                                                                 |
| <i>a</i> [Å]                                      | 10.4092(11)                                                                     |
| <i>b</i> [Å]                                      | 12.9008(13)                                                                     |
| <i>c</i> [Å]                                      | 13.8906(16)                                                                     |
| <i>α</i> [°]                                      | 90                                                                              |
| <i>β</i> [°]                                      | 100.978(6)                                                                      |
| <i>γ</i> [°]                                      | 90                                                                              |
| Volume                                            | 1831.2(3) Å <sup>3</sup>                                                        |
| <i>Z</i>                                          | 4                                                                               |
| Cell measurement reflections used                 | 9913                                                                            |
| Cell measurement <i>θ</i> min/max                 | 2.54°/30.47°                                                                    |
| Diffractometer control software                   | BRUKER D8 KAPPA APEX 2 (3.0-2009)                                               |
| Diffractometer measurement device                 | Bruker D8 KAPPA series II with APEX II area detector system                     |
| Diffractometer measurement method                 | Data collection strategy APEX 2/COSMO                                           |
| <i>θ</i> range for data collection                | 2.173°- 30.578°                                                                 |
| Completeness to <i>θ</i> = 25.242°                | 100.0%                                                                          |
| Completeness to <i>θ</i> <sub>max</sub> = 30.578° | 98.4%                                                                           |
| Index ranges                                      | -14 ≤ <i>h</i> ≤ 14                                                             |
|                                                   | -18 ≤ <i>k</i> ≤ 18                                                             |
|                                                   | -19 ≤ <i>l</i> ≤ 19                                                             |
| Computing data reduction                          | BRUKER D8 KAPPA APEX 2 (3.0-2009)                                               |
| Absorption coefficient                            | 0.170 mm <sup>-1</sup>                                                          |
| Absorption correction                             | Semi-empirical from equivalents                                                 |

|                                           |                                                              |
|-------------------------------------------|--------------------------------------------------------------|
| Computation absorption correction         | BRUKER AXS SMART APEX 2 Vers. 3.0-2009                       |
| Max./min. Transmission                    | 0.75/0.58                                                    |
| $R_{\text{merg}}$ before/after correction | 0.0496/0.0413                                                |
| Computing structure solution              | BRUKER D8 KAPPA APEX 2 (3.0-2009)                            |
| Computing structure refinement            | SHELXL-2017/1 (Sheldrick, 2017)                              |
| Refinement method                         | Full-matrix least-squares on $F^2$                           |
| Reflections collected                     | 34365                                                        |
| Independent reflections                   | 5530                                                         |
| $R_{\text{int}}$                          | 0.0300                                                       |
| Reflections with $I > 2\sigma(I)$         | 4423                                                         |
| Restraints                                | 0                                                            |
| Parameter                                 | 284                                                          |
| GooF                                      | 1.054                                                        |
| Weighting details                         | $w = 1/[\sigma^2(F_{\text{obs}}^2) + (0.0641P)^2 + 1.3305P]$ |
|                                           | where $P = (F_{\text{obs}}^2 + 2F_{\text{calc}}^2)/3$        |
| $R_1 [I > 2\sigma(I)]$                    | 0.0472                                                       |
| $wR_2 [I > 2\sigma(I)]$                   | 0.1364                                                       |
| $R_1 [\text{all data}]$                   | 0.0617                                                       |
| $wR_2 [\text{all data}]$                  | 0.1364                                                       |
| Largest diff. peak and hole               | 0.704/-0.401                                                 |

Table 2: Atomic coordinates ( $\times 10^4$ ) and equivalent isotropic displacement parameters ( $\text{\AA}^2 \times 10^3$ ) for dnp\_130m.  $U_{\text{eq}}$  is defined as one third of the trace of the orthogonalized  $U_{ij}$  tensor.

|       | $x$       | $y$      | $z$      | $U_{\text{eq}}$ |
|-------|-----------|----------|----------|-----------------|
| F(1)  | 123(1)    | 5901(1)  | 584(1)   | 49(1)           |
| F(2)  | 2027(1)   | 5214(1)  | 1022(1)  | 45(1)           |
| F(3)  | 571(1)    | 5056(1)  | 1925(1)  | 54(1)           |
| F(4)  | 622(1)    | 7968(1)  | 700(1)   | 43(1)           |
| F(5)  | 2388(1)   | 7203(1)  | 481(1)   | 48(1)           |
| F(6)  | 2474(1)   | 8348(1)  | 1601(1)  | 47(1)           |
| F(7)  | 2744(1)   | 5674(1)  | 3157(1)  | 51(1)           |
| F(8)  | 3837(1)   | 6413(1)  | 2188(1)  | 32(1)           |
| F(9)  | 3110(1)   | 7307(1)  | 3263(1)  | 38(1)           |
| O(1)  | 621(1)    | 7053(1)  | 2419(1)  | 25(1)           |
| N(1)  | -2115(1)  | 7412(1)  | 1407(1)  | 17(1)           |
| N(2)  | -3263(1)  | 7694(1)  | 1679(1)  | 17(1)           |
| N(3)  | -1548(1)  | 6464(1)  | 3151(1)  | 17(1)           |
| N(4)  | -2764(1)  | 6773(1)  | 3264(1)  | 17(1)           |
| N(5)  | -996(1)   | 8470(1)  | 2993(1)  | 16(1)           |
| N(6)  | -2223(1)  | 8641(1)  | 3171(1)  | 17(1)           |
| C(1)  | -2357(2)  | 7377(1)  | 428(1)   | 20(1)           |
| H(1)  | -1732     | 7200     | 39       | 24              |
| C(2)  | -3661(2)  | 7638(1)  | 57(1)    | 22(1)           |
| H(2)  | -4085     | 7675     | -611     | 27              |
| C(3)  | -4194(1)  | 7831(1)  | 873(1)   | 21(1)           |
| H(3)  | -5074     | 8029     | 868      | 25              |
| C(4)  | -1301(2)  | 5562(1)  | 3625(1)  | 21(1)           |
| H(4)  | -517      | 5173     | 3669     | 25              |
| C(5)  | -2366(2)  | 5275(1)  | 4045(1)  | 25(1)           |
| H(5)  | -2451     | 4672     | 4420     | 30              |
| C(6)  | -3271(2)  | 6065(1)  | 3793(1)  | 22(1)           |
| H(6)  | -4110     | 6099     | 3966     | 26              |
| C(7)  | -259(1)   | 9281(1)  | 3358(1)  | 20(1)           |
| H(7)  | 641       | 9364     | 3334     | 24              |
| C(8)  | -1006(2)  | 9986(1)  | 3779(1)  | 24(1)           |
| H(8)  | -727      | 10624    | 4091     | 28              |
| C(9)  | -2243(2)  | 9551(1)  | 3643(1)  | 21(1)           |
| H(9)  | -2984     | 9845     | 3848     | 25              |
| C(10) | 1510(1)   | 6731(1)  | 1909(1)  | 18(1)           |
| H(10) | -4228(19) | 7985(15) | 2916(14) | 20(5)           |
| C(11) | 1074(2)   | 5711(1)  | 1349(2)  | 32(1)           |
| C(12) | 1756(2)   | 7573(1)  | 1163(1)  | 30(1)           |
| C(13) | 2821(2)   | 6528(1)  | 2639(1)  | 25(1)           |
| B(1)  | -3274(2)  | 7816(1)  | 2787(1)  | 17(1)           |
| Be(1) | -822(2)   | 7299(1)  | 2421(1)  | 16(1)           |

Table 3: Anisotropic displacement parameters ( $\text{\AA}^2 \times 10^3$ ) for dnp\_130m. The anisotropic displacement factor exponent takes the form:  $-2\pi^2[h^2a^{*2}U_{11} + \dots + 2hka^*b^*U_{12}]$

|       | $U_{11}$ | $U_{22}$ | $U_{33}$ | $U_{23}$ | $U_{13}$ | $U_{12}$ |
|-------|----------|----------|----------|----------|----------|----------|
| F(1)  | 31(1)    | 48(1)    | 58(1)    | -33(1)   | -16(1)   | 10(1)    |
| F(2)  | 30(1)    | 40(1)    | 62(1)    | -28(1)   | 0(1)     | 10(1)    |
| F(3)  | 40(1)    | 27(1)    | 95(1)    | 0(1)     | 13(1)    | -11(1)   |
| F(4)  | 33(1)    | 49(1)    | 45(1)    | 23(1)    | 5(1)     | 7(1)     |
| F(5)  | 41(1)    | 72(1)    | 34(1)    | 9(1)     | 19(1)    | 5(1)     |
| F(6)  | 45(1)    | 29(1)    | 66(1)    | 7(1)     | 6(1)     | -11(1)   |
| F(7)  | 32(1)    | 54(1)    | 61(1)    | 32(1)    | -4(1)    | 2(1)     |
| F(8)  | 16(1)    | 42(1)    | 39(1)    | -10(1)   | 4(1)     | 3(1)     |
| F(9)  | 23(1)    | 57(1)    | 30(1)    | -18(1)   | -1(1)    | 1(1)     |
| O(1)  | 17(1)    | 37(1)    | 21(1)    | -3(1)    | 4(1)     | 6(1)     |
| N(1)  | 16(1)    | 16(1)    | 17(1)    | 0(1)     | 1(1)     | 1(1)     |
| N(2)  | 15(1)    | 15(1)    | 20(1)    | 0(1)     | -1(1)    | 0(1)     |
| N(3)  | 18(1)    | 13(1)    | 19(1)    | -1(1)    | 2(1)     | 1(1)     |
| N(4)  | 17(1)    | 16(1)    | 20(1)    | 0(1)     | 4(1)     | -1(1)    |
| N(5)  | 15(1)    | 14(1)    | 19(1)    | -1(1)    | 1(1)     | -1(1)    |
| N(6)  | 17(1)    | 14(1)    | 18(1)    | -1(1)    | 2(1)     | 2(1)     |
| C(1)  | 25(1)    | 17(1)    | 17(1)    | -1(1)    | -1(1)    | 0(1)     |
| C(2)  | 24(1)    | 19(1)    | 20(1)    | 1(1)     | -6(1)    | -2(1)    |
| C(3)  | 17(1)    | 15(1)    | 26(1)    | 2(1)     | -4(1)    | -2(1)    |
| C(4)  | 26(1)    | 15(1)    | 21(1)    | 0(1)     | 2(1)     | 2(1)     |
| C(5)  | 34(1)    | 17(1)    | 25(1)    | 4(1)     | 8(1)     | -2(1)    |
| C(6)  | 25(1)    | 19(1)    | 22(1)    | 0(1)     | 7(1)     | -4(1)    |
| C(7)  | 20(1)    | 15(1)    | 23(1)    | 1(1)     | -2(1)    | -3(1)    |
| C(8)  | 30(1)    | 14(1)    | 25(1)    | -2(1)    | -2(1)    | -1(1)    |
| C(9)  | 26(1)    | 15(1)    | 20(1)    | -1(1)    | 2(1)     | 4(1)     |
| C(10) | 14(1)    | 18(1)    | 21(1)    | -2(1)    | 2(1)     | 0(1)     |
| C(11) | 22(1)    | 26(1)    | 46(1)    | -13(1)   | 1(1)     | 1(1)     |
| C(12) | 26(1)    | 32(1)    | 31(1)    | 6(1)     | 6(1)     | -1(1)    |
| C(13) | 17(1)    | 31(1)    | 26(1)    | 0(1)     | 2(1)     | 2(1)     |
| B(1)  | 16(1)    | 14(1)    | 21(1)    | -1(1)    | 2(1)     | 0(1)     |
| Be(1) | 15(1)    | 16(1)    | 17(1)    | 0(1)     | 2(1)     | 1(1)     |



Table 4: Bond lengths [Å] for dnp\_130m.

|            |            |            |            |             |            |
|------------|------------|------------|------------|-------------|------------|
| F(1)-C(11) | 1.330(2)   | N(1)-N(2)  | 1.3693(16) | N(6)-C(9)   | 1.3462(18) |
| F(2)-C(11) | 1.332(2)   | N(1)-Be(1) | 1.759(2)   | N(6)-B(1)   | 1.5462(19) |
| F(3)-C(11) | 1.337(2)   | N(2)-C(3)  | 1.3461(18) | C(1)-C(2)   | 1.398(2)   |
| F(4)-C(12) | 1.334(2)   | N(2)-B(1)  | 1.549(2)   | C(2)-C(3)   | 1.377(2)   |
| F(5)-C(12) | 1.340(2)   | N(3)-C(4)  | 1.3382(18) | C(4)-C(5)   | 1.397(2)   |
| F(6)-C(12) | 1.324(2)   | N(3)-N(4)  | 1.3638(16) | C(5)-C(6)   | 1.387(2)   |
| F(7)-C(13) | 1.327(2)   | N(3)-Be(1) | 1.746(2)   | C(7)-C(8)   | 1.395(2)   |
| F(8)-C(13) | 1.3362(18) | N(4)-C(6)  | 1.3417(19) | C(8)-C(9)   | 1.385(2)   |
| F(9)-C(13) | 1.324(2)   | N(4)-B(1)  | 1.5491(19) | C(10)-C(11) | 1.552(2)   |
| O(1)-C(10) | 1.3352(17) | N(5)-C(7)  | 1.3385(18) | C(10)-C(12) | 1.555(2)   |
| O(1)-Be(1) | 1.535(2)   | N(5)-N(6)  | 1.3638(16) | C(10)-C(13) | 1.560(2)   |
| N(1)-C(1)  | 1.3362(19) | N(5)-Be(1) | 1.733(2)   |             |            |

Table 5: Bond angles [°] for dnp\_130m.

|                  |            |                   |            |                  |            |
|------------------|------------|-------------------|------------|------------------|------------|
| C(10)-O(1)-Be(1) | 147.43(12) | N(2)-C(3)-C(2)    | 108.79(13) | F(6)-C(12)-F(5)  | 106.50(15) |
| C(1)-N(1)-N(2)   | 106.51(12) | N(3)-C(4)-C(5)    | 110.05(13) | F(4)-C(12)-F(5)  | 107.66(15) |
| C(1)-N(1)-Be(1)  | 141.24(12) | C(6)-C(5)-C(4)    | 104.77(13) | F(6)-C(12)-C(10) | 111.81(14) |
| N(2)-N(1)-Be(1)  | 112.08(11) | N(4)-C(6)-C(5)    | 108.58(14) | F(4)-C(12)-C(10) | 110.17(13) |
| C(3)-N(2)-N(1)   | 109.48(12) | N(5)-C(7)-C(8)    | 110.08(13) | F(5)-C(12)-C(10) | 112.77(15) |
| C(3)-N(2)-B(1)   | 132.27(13) | C(9)-C(8)-C(7)    | 104.85(13) | F(9)-C(13)-F(7)  | 107.76(15) |
| N(1)-N(2)-B(1)   | 118.24(11) | N(6)-C(9)-C(8)    | 108.63(13) | F(9)-C(13)-F(8)  | 106.84(13) |
| C(4)-N(3)-N(4)   | 107.00(12) | O(1)-C(10)-C(11)  | 111.33(13) | F(7)-C(13)-F(8)  | 107.34(14) |
| C(4)-N(3)-Be(1)  | 139.31(12) | O(1)-C(10)-C(12)  | 110.79(13) | F(9)-C(13)-C(10) | 111.07(13) |
| N(4)-N(3)-Be(1)  | 113.63(11) | C(11)-C(10)-C(12) | 109.16(14) | F(7)-C(13)-C(10) | 110.88(13) |
| C(6)-N(4)-N(3)   | 109.60(12) | O(1)-C(10)-C(13)  | 108.45(12) | F(8)-C(13)-C(10) | 112.71(13) |
| C(6)-N(4)-B(1)   | 133.39(13) | C(11)-C(10)-C(13) | 108.62(12) | N(6)-B(1)-N(2)   | 105.96(11) |
| N(3)-N(4)-B(1)   | 117.01(11) | C(12)-C(10)-C(13) | 108.41(12) | N(6)-B(1)-N(4)   | 106.74(11) |
| C(7)-N(5)-N(6)   | 107.09(12) | F(1)-C(11)-F(2)   | 107.78(16) | N(2)-B(1)-N(4)   | 105.61(11) |
| C(7)-N(5)-Be(1)  | 138.82(12) | F(1)-C(11)-F(3)   | 106.11(15) | O(1)-Be(1)-N(5)  | 111.64(12) |
| N(6)-N(5)-Be(1)  | 114.05(11) | F(2)-C(11)-F(3)   | 107.58(16) | O(1)-Be(1)-N(3)  | 113.93(12) |
| C(9)-N(6)-N(5)   | 109.35(12) | F(1)-C(11)-C(10)  | 110.25(14) | N(5)-Be(1)-N(3)  | 100.18(11) |
| C(9)-N(6)-B(1)   | 133.79(12) | F(2)-C(11)-C(10)  | 114.41(14) | O(1)-Be(1)-N(1)  | 127.96(13) |
| N(5)-N(6)-B(1)   | 116.83(11) | F(3)-C(11)-C(10)  | 110.34(15) | N(5)-Be(1)-N(1)  | 99.43(10)  |
| N(1)-C(1)-C(2)   | 110.46(14) | F(6)-C(12)-F(4)   | 107.69(15) | N(3)-Be(1)-N(1)  | 99.55(10)  |
| C(3)-C(2)-C(1)   | 104.77(13) |                   |            |                  |            |

### Computational calculations

For technical details of the quantum chemical calculations see manuscript text.

**Fig. S4:** Molecular structure of  $\text{Cp}^*\text{Be}^+$  from the DFT calculations (B3LYP/TZVPP, see main text).

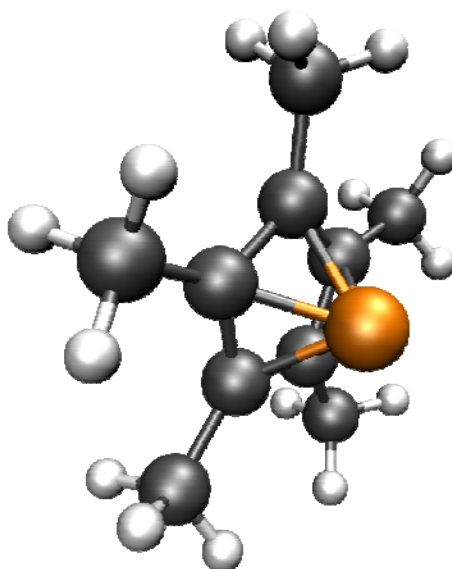

**Fig. S5:** Molecular structure of  $\text{Cp}^*\text{BeOR}^{\text{F}}$  from the DFT calculations (B3LYP/TZVPP, see main text).

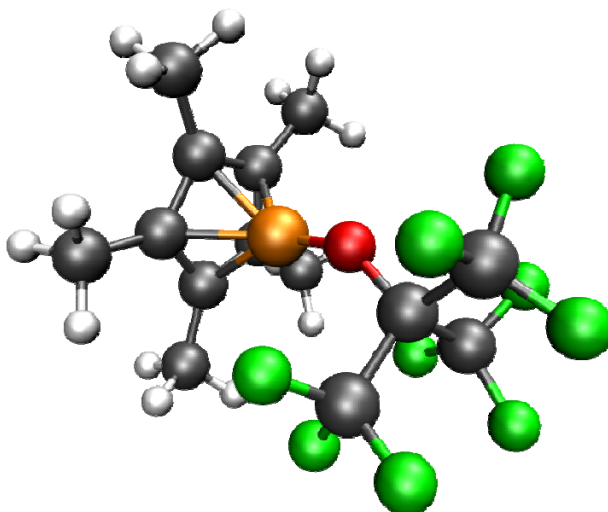

**Fig. S6:** Molecular structure of  $\text{TpBe}^+$  from the DFT calculations (B3LYP/TZVPP, see main text).

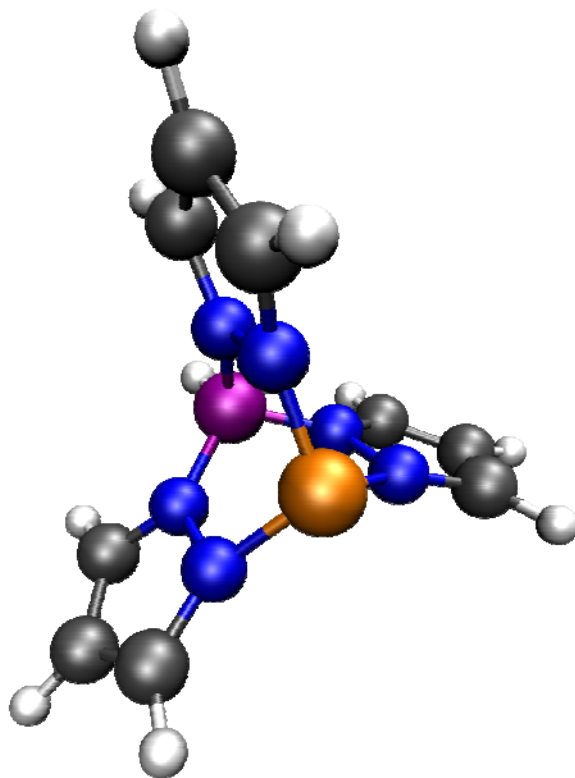

**Fig. S7:** Molecular structure of  $\text{Cp}^*\text{BeFAl}(\text{OR}^{\text{F}})_3$  from the DFT calculations (B3LYP/TZVPP, see main text).

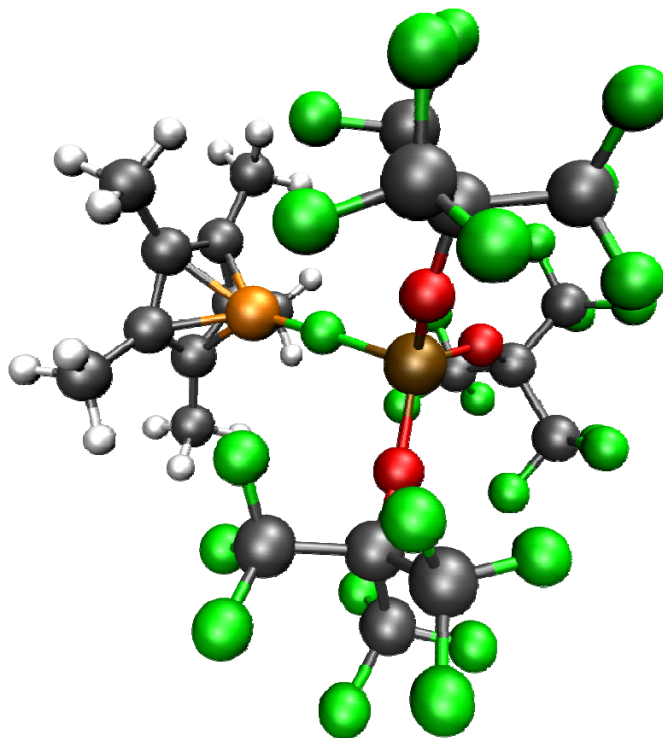

**Fig. S8:** Molecular structure of  $\text{TpBeOR}^{\text{F}}$  from the DFT calculations (B3LYP/TZVPP, see main text).

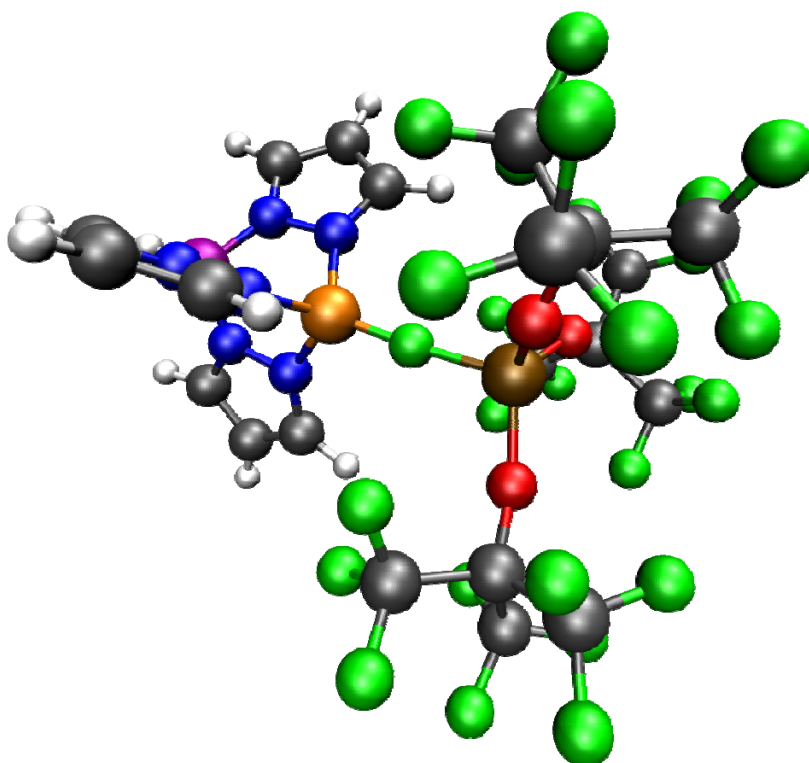

**Fig. S9:** Molecular structure of  $\text{TpBeFAl(OR}^{\text{F}}\text{)}_3$  from the DFT calculations (B3LYP/TZVPP, see main text).

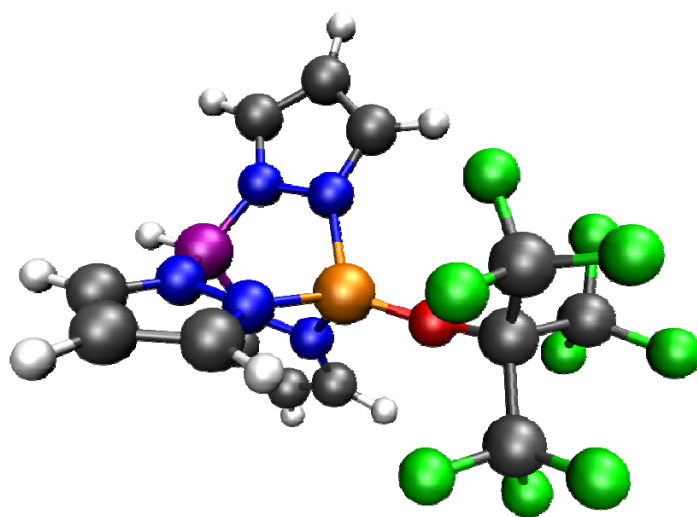

**Fig. S10:** LOL plot of  $\text{Cp}^*\text{Be}^+$  in the C-C-Be plane

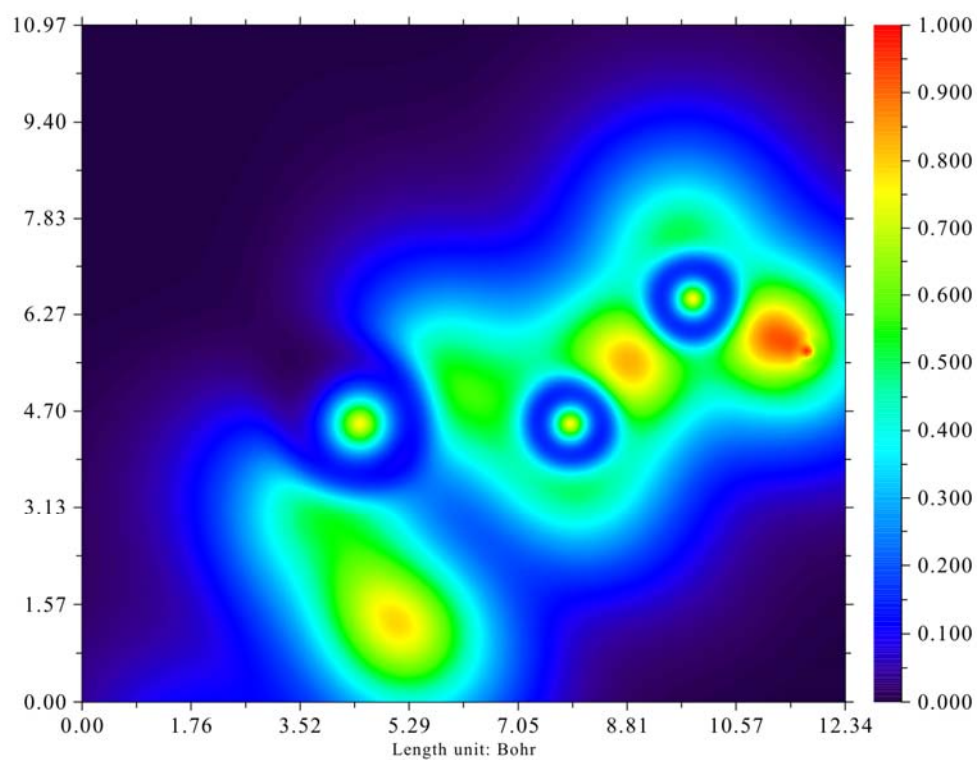

**Fig. S11:** LOL plot of  $\text{Cp}^*\text{BeOR}^{\text{F}}$  in the C-Be-O plane

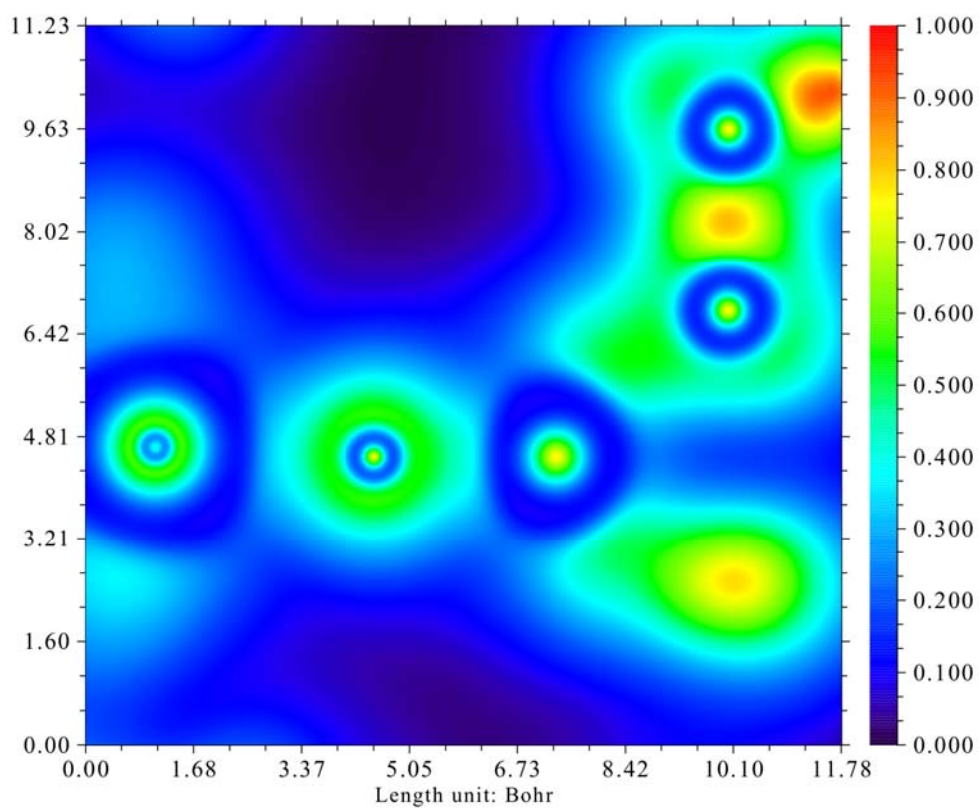

**Fig. S12:** LOL plot of  $\text{Cp}^*\text{BeFAl}(\text{OR}^{\text{F}})_3$  in the C-Be-F plane

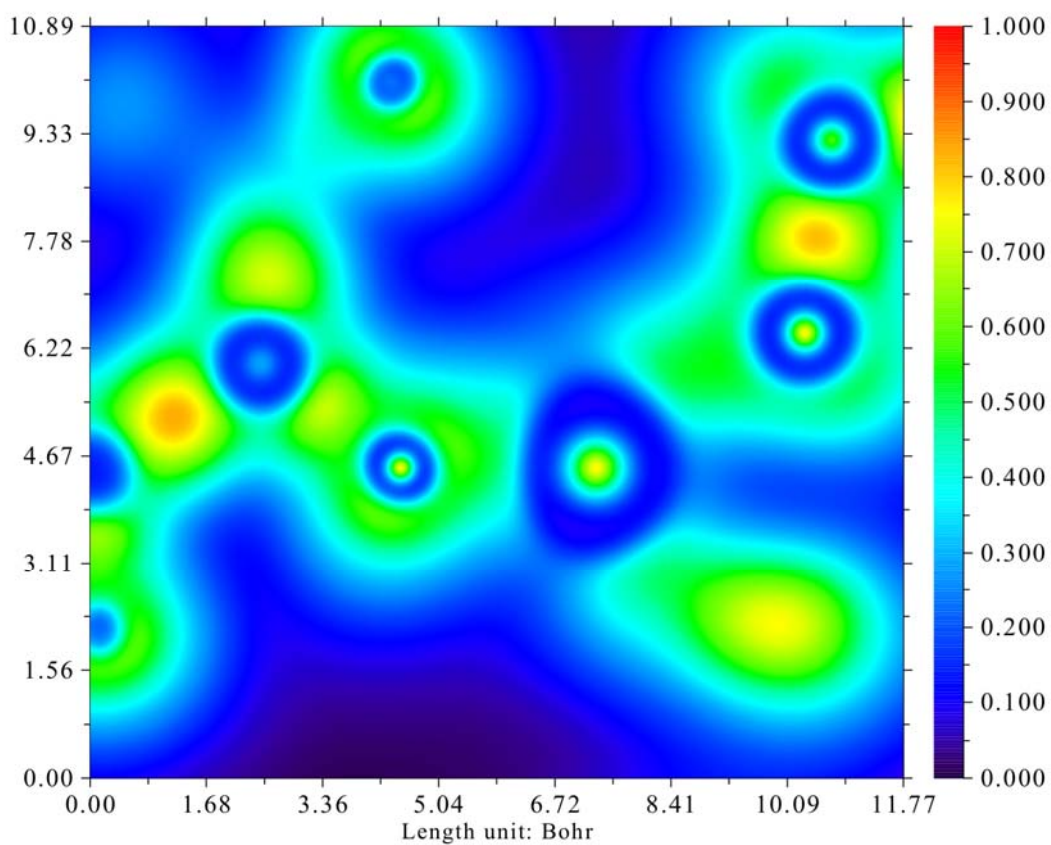

**Fig. S13:** LOL plot of  $\text{TpBe}^+$  in the Be-N-N plane

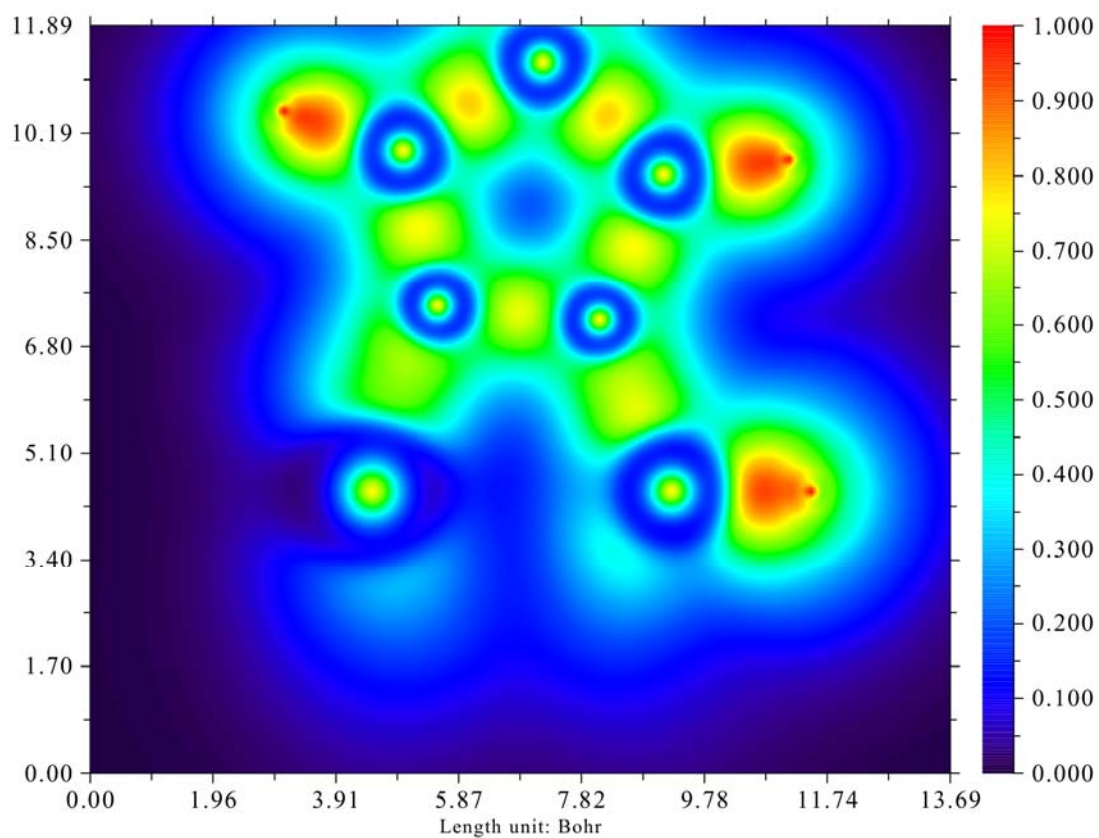



**Fig. S14:** LOL plot of TpBeORF in the N-Be-O plane.

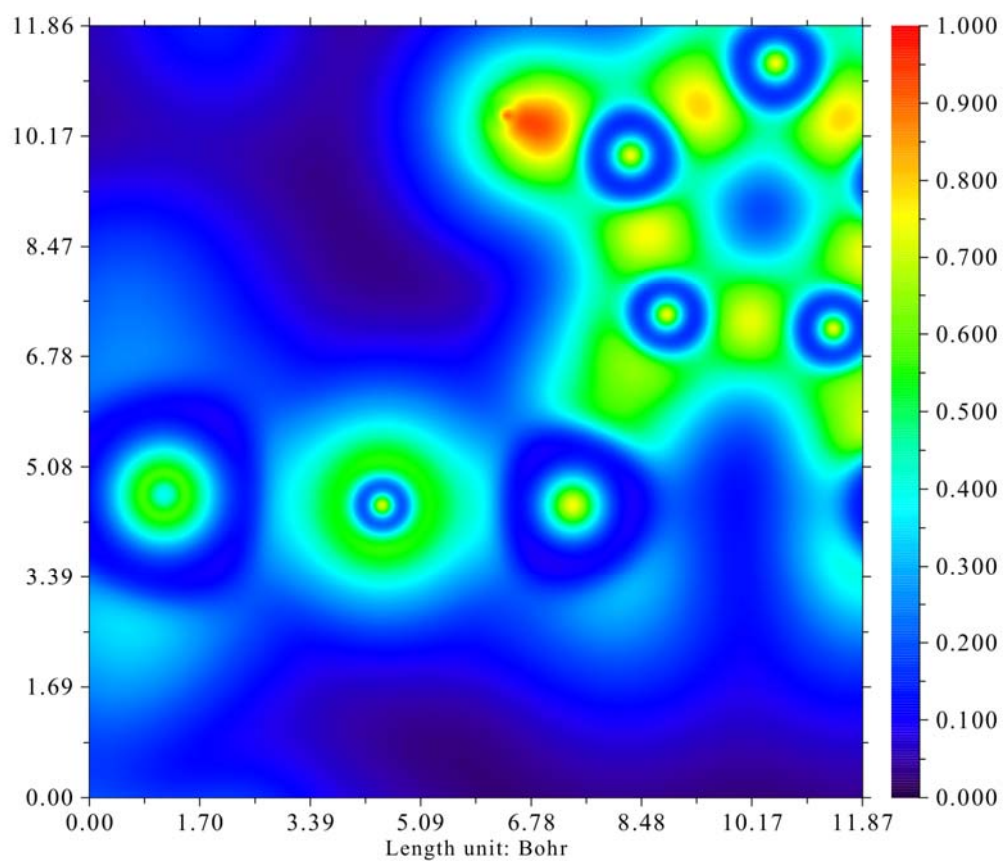

**Fig. S15:** LOL plot of TpBeFAl(ORF)<sub>3</sub> in the N-Be-F plane

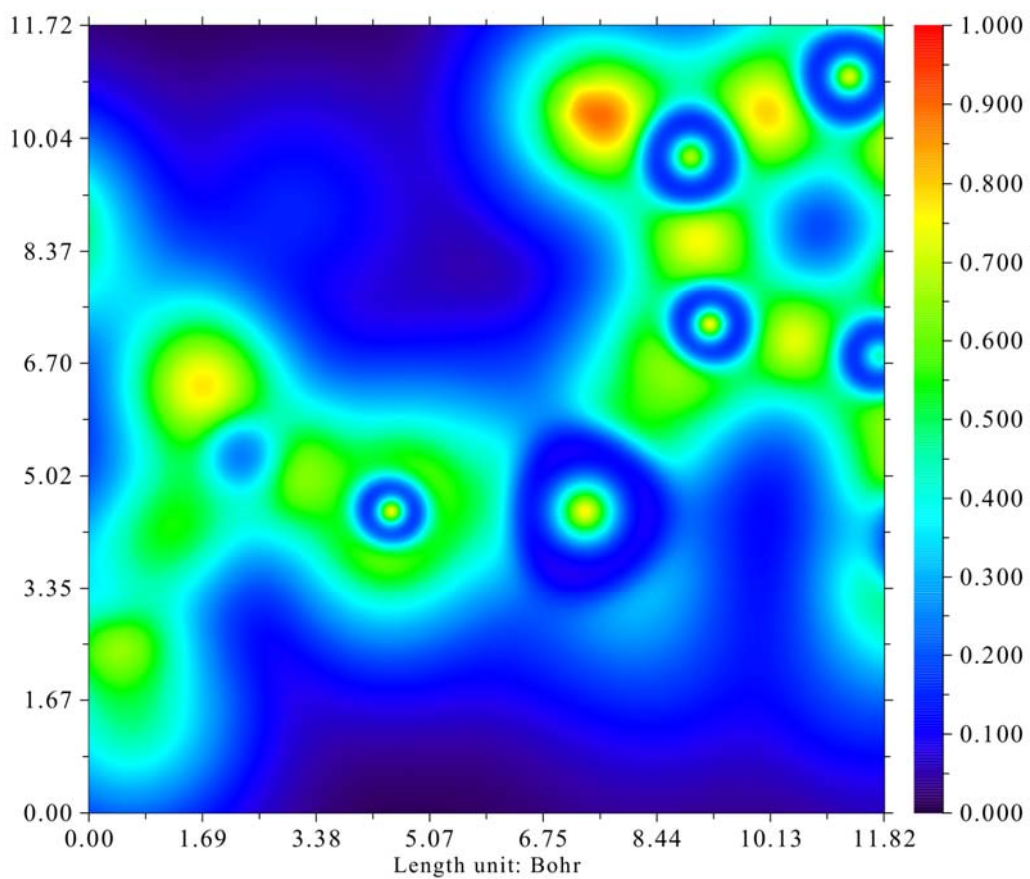

Supplement: Supplementary file 1 [file B20034-suppinfo2a.pdf › Supplement/B20034-suppinfo2a.pdf]
